# Supplementary material for: Discovery of a small molecule inhibitor targeting dengue virus NS5 RNA-dependent RNA polymerase
Source: PubMed Central journal article supplement (PMC6886872; doi:10.1371/journal.pntd.0007894), 2019-11-18
Supplement: pntd.0007894.s004.pdf [file pntd.0007894.s004.pdf]

S4 Fig.

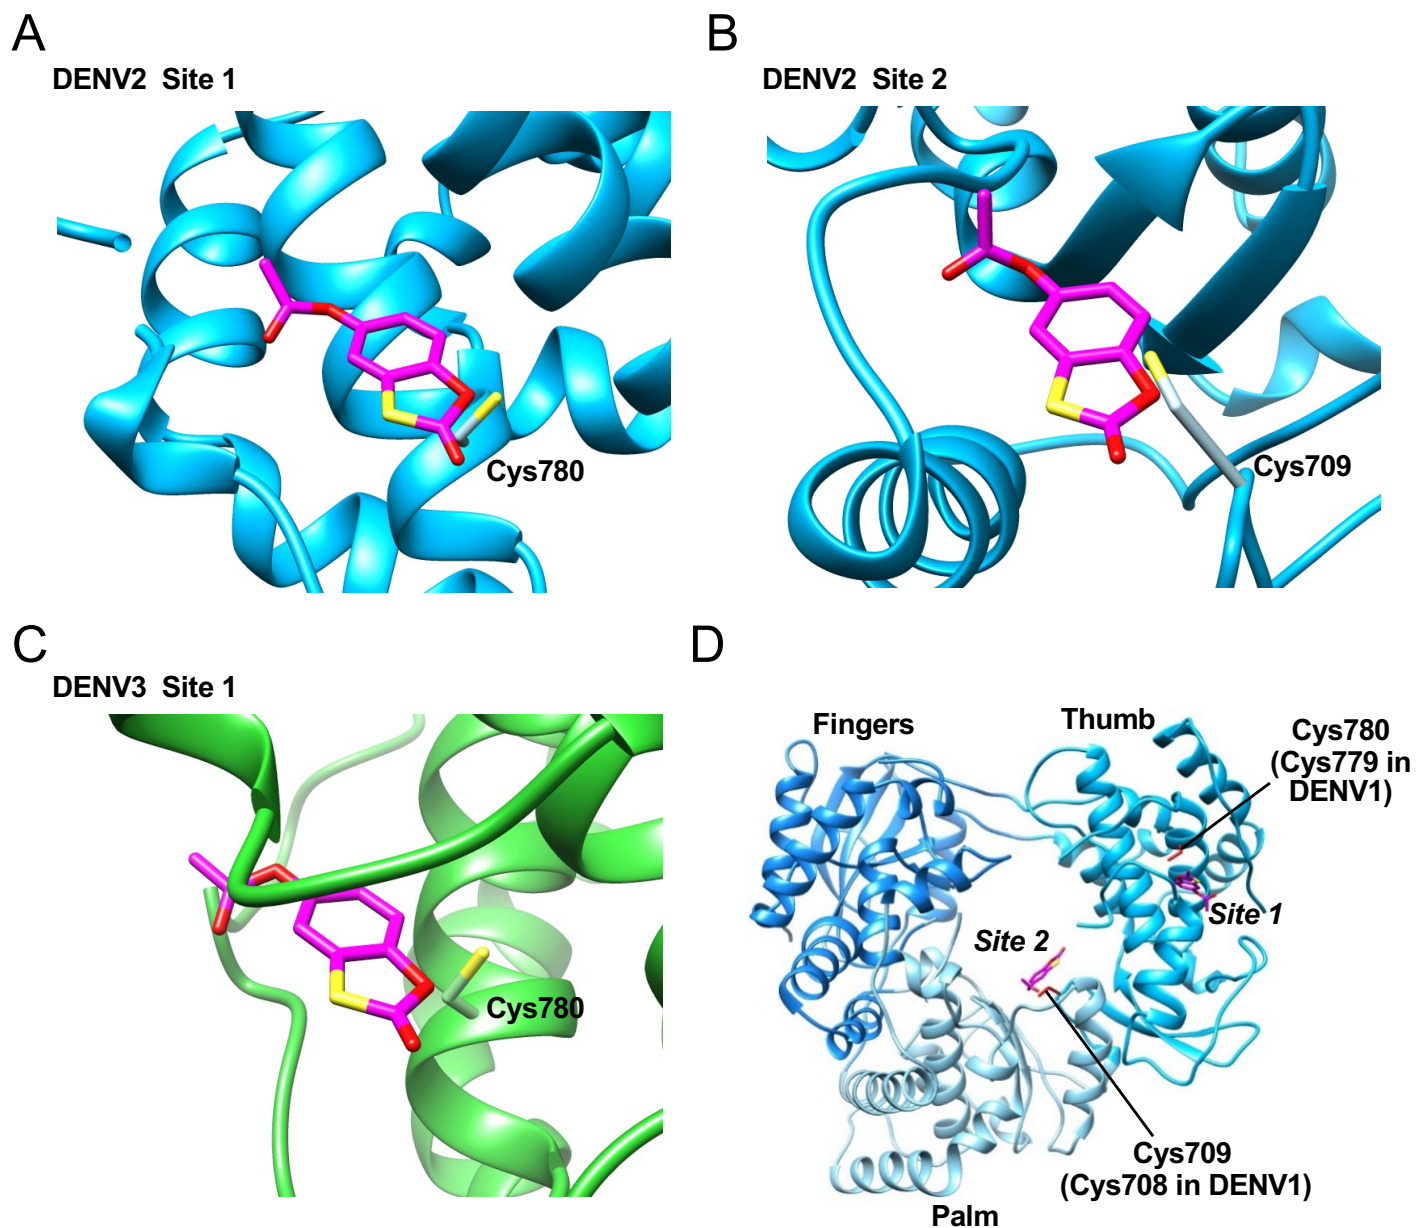

**S4 Fig. Cys residues in contact with RK-0404678.** A. Cys780 in DENV2 Site 1. B. Cys709 in DENV2 Site 2. C. Cys780 in DENV3 Site 1. D. Positions of the Cys780 and Cys709 residues in Sites 1 and 2 in DENV2. Their side chains are colored red, and the RK-0404678 molecules are magenta.
