# Supplementary material for: Discovery of a small molecule inhibitor targeting dengue virus NS5 RNA-dependent RNA polymerase
Source: PubMed Central journal article supplement (PMC6886872; doi:10.1371/journal.pntd.0007894), 2019-11-18
Supplement: pntd.0007894.s005.pdf [file pntd.0007894.s005.pdf]

S5 Fig.

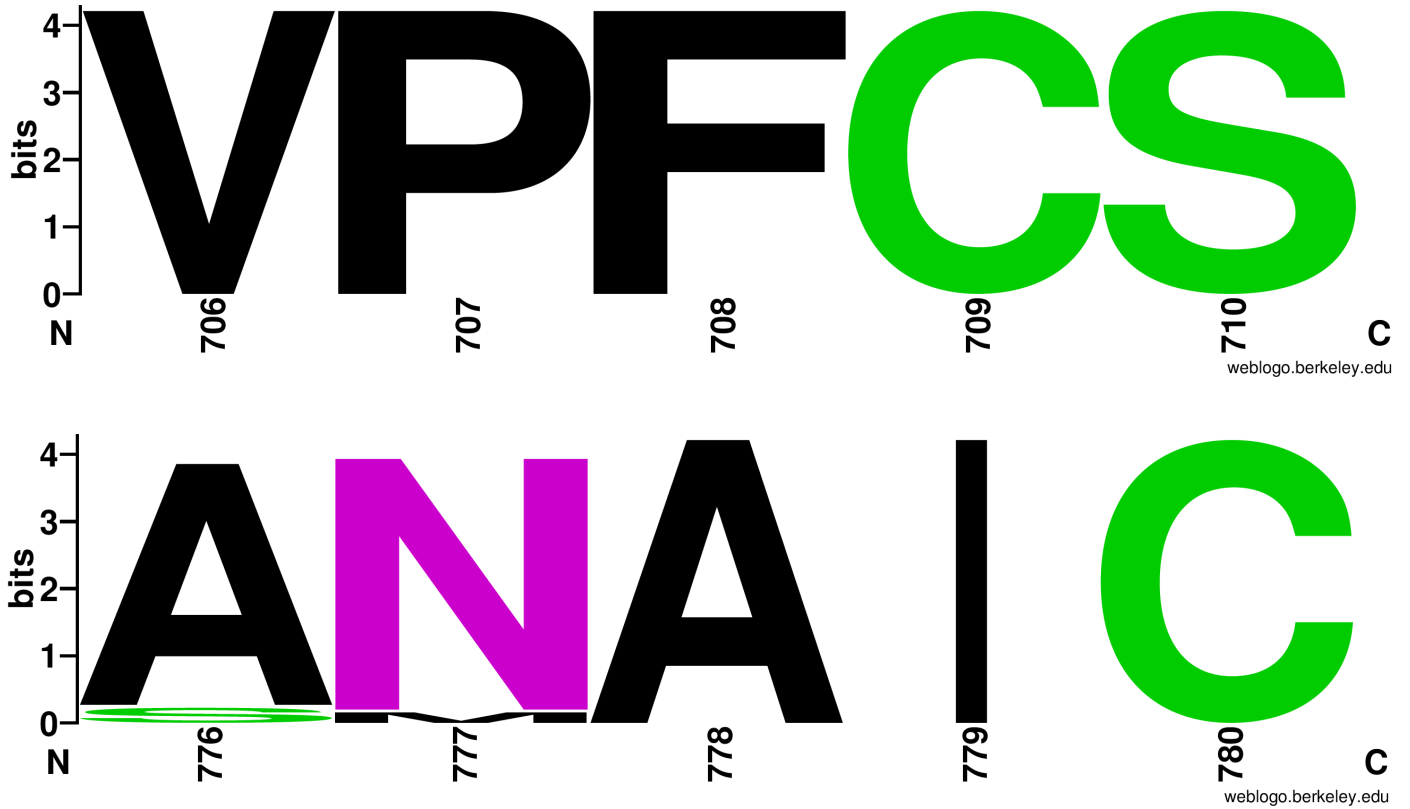

**S5 Fig. Conservation of the Cys709 and Cys780 residues.** WebLogo representation of the sequence conservation of NS5 residues. The NS5 sequences of 219 independent DENV1-4 viruses were analyzed. The height of a particular residue indicates its degree of conservation. The Cys709 and Cys780 residues are highly conserved in DENV1-4.
