# Supplementary material for: Discovery of a small molecule inhibitor targeting dengue virus NS5 RNA-dependent RNA polymerase
Source: PubMed Central journal article supplement (PMC6886872; doi:10.1371/journal.pntd.0007894), 2019-11-18
Supplement: pntd.0007894.s006.pdf [file pntd.0007894.s006.pdf]

S6 Fig.

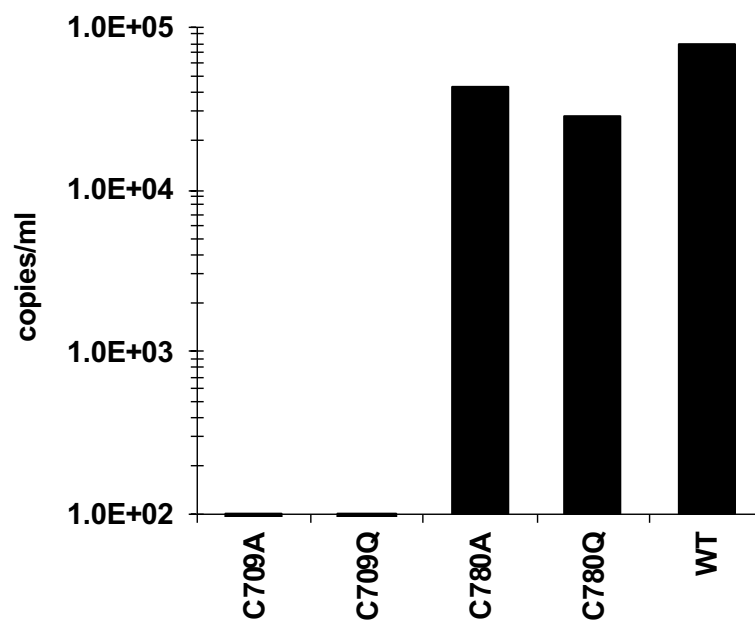

**S6 Fig. NS5 mutant viruses were rescued by transfecting BHK-21 cells with CPER products.** The viral titer in the culture supernatant was evaluated by RT-qPCR.
