# Supplementary material for: Discovery of a small molecule inhibitor targeting dengue virus NS5 RNA-dependent RNA polymerase
Source: PubMed Central journal article supplement (PMC6886872; doi:10.1371/journal.pntd.0007894), 2019-11-18
Supplement: pntd.0007894.s007.pdf [file pntd.0007894.s007.pdf]

S7 Fig.

|           |     |            |             |             |             |            |             |             |              |            |
|-----------|-----|------------|-------------|-------------|-------------|------------|-------------|-------------|--------------|------------|
| DENV1 NS5 | 1   | -----      | -GTGAQGETL  | GEKWKRLNQ   | LSKSEFNTYK  | RSGIIEVDRS | EAKEGLKRGE  | PTKHAVSRGT  | AKLRWFVERN   |            |
| DENV2 NS5 | 1   | -----      | -GTGNIGETL  | GEKWKSRINA  | LGKSEFQIYK  | KSGIQEVDRT | LAKEGIKRGE  | TDHHAVSRGS  | AKLRWFVERN   |            |
| DENV3 NS5 | 1   | -----      | -GTGSQGETL  | GEKWKRLNQ   | LSRKEFDLYK  | KSGITEVDRT | EAKEGLKRGE  | ITHHAVSRGS  | AKLQWFVERN   |            |
| DENV4 NS5 | -11 | SLIKNAQTPR | RGTGTGETL   | GEKWKRLNS   | LDRKEFEEYK  | RSGILEVDRT | EAKSALKDS   | KIKYAVSRGT  | SKIRWIVERG   |            |
| DENV1 NS5 |     |            | LVKPEGKVID  | LGCGRGGWSY  | YCAGLKKVTE  | VKGYTKGGPG | HEEPIPMATY  | GWNLVKLYSG  | KDVFFTPPEK   | CDTLLCDIGE |
| DENV2 NS5 |     |            | MVTPGKQVVD  | LGCGRGGWSY  | YCGGLKNVRE  | VKGLTKGGPG | HEEPIPMSTY  | GWNLVRLQSG  | VDVFFTPPEK   | CDTLLCDIGE |
| DENV3 NS5 |     |            | MVIPGGRVID  | LGCGRGGWSY  | YCAGLKKVTE  | VRGYTKGGPG | HEEPIPMSTY  | GWNIVKLMMSG | KDVFFYLPPEK  | CDTLLCDIGE |
| DENV4 NS5 |     |            | MVKPKGKQVVD | LGCGRGGWSY  | YMATLKNVTE  | VKGYTKGGPG | HEEPIPMATY  | GWNLVKLHSG  | VDVFFYKPTTEQ | VDTLLCDIGE |
| DENV1 NS5 |     |            | SSPNPTIEEG  | RTLRVLKMQE  | PWLKNN-QFC  | IKILNPYMPS | VVETLEQMQR  | KHGGMLVRNP  | LSRNSTHEMY   | WVSCGTGNIV |
| DENV2 NS5 |     |            | SSPNPTVEAG  | RTLRVLNLVE  | NWLNNNTQFC  | IKVLNPYMPS | VIEKMEALQR  | KYGGALVRNP  | LSRNSTHEMY   | WLSNAGSNIV |
| DENV3 NS5 |     |            | SSPSPTVEES  | RTLIRVLKMQE | PWLKNN-QFC  | IKVLNPYMPT | VIEHLERLQR  | KHGGMLVRNP  | LSRNSTHEMY   | WISNGTGNIV |
| DENV4 NS5 |     |            | SSSNPTIEEG  | RTLRVLKMQE  | PWLSSKPEFC  | IKVLNPYMPT | VIEELEKLQR  | KHGGSLVRCP  | LSRNSTHEMY   | WVSGVSGNIV |
| DENV1 NS5 |     |            | SAVNMTSRML  | LNRFTMAHRK  | PTYERDVLG   | AGTRHVAVEP | EVANLDIIGQ  | RIENIKNGHK  | STWHYDEDNP   | YKTWAYHGSY |
| DENV2 NS5 |     |            | SSVNMISRML  | LNRFTMRHKK  | ATYEPDVLG   | SGTRNIGIES | EIPNLDIIGK  | RIEKIKQEHK  | TSWHYDQDHP   | YKTWAYHGSY |
| DENV3 NS5 |     |            | SSVNMVSRLL  | LNRFTMTYRR  | PTIEKDVLG   | AGTRHVAVEP | ETPNMDVIGE  | RIRRIKEEHS  | STWHYDDENP   | YKTWAYHGSY |
| DENV4 NS5 |     |            | SSVNTTSKML  | LNRFTTRHRK  | PTYEKDADLG  | AGTRSVSTET | EKPDMTIIGR  | RLQRLQEEHK  | ETWHYDHENP   | YRTWAYHGSY |
| DENV1 NS5 |     |            | EVKPSGSASS  | MVNGVRLLT   | KPWDVPMVT   | QIAMTDTTFF | GQQRVFKEKV  | DTRTPKAKRG  | TAQIMEVTAR   | WLWGLSRNK  |
| DENV2 NS5 |     |            | ETKQTSASS   | MVNGVRLLT   | KPWDVPMVT   | QMAMTDTTFF | GQQRVFKEKV  | DTRTQEPKEG  | TKKLMKITAE   | WLWELGSKK  |
| DENV3 NS5 |     |            | EVKATGSASS  | MINGVVKLLT  | KPWDVPMVT   | QMAMTDTTFF | GQQRVFKEKV  | DTRTPKMPFG  | TRKVMETAG    | WLWRTLGRNK |
| DENV4 NS5 |     |            | EAPSTGSASS  | MVNGVVKLLT  | KPWDVPMVT   | QLAMTDTTFF | GQQRVFKEKV  | DTRTPQPKPG  | TRVVMTTAN    | WLWALLGRKK |
| DENV1 NS5 |     |            | KPRICTREEF  | TRKVRSNAAI  | GAVFVDENQW  | NSAKEAVEDE | RFWDLVHRER  | ELHKQKGCAT  | CVYNNMGKRE   | KKLGEFGKAK |
| DENV2 NS5 |     |            | TPRMCTREEF  | TRKVRSNAAI  | GAIFTDENKW  | KSAREAVEDS | RFWELVDKER  | NLHLEGKCEP  | CVYNNMGKRE   | KKLGEFGKAK |
| DENV3 NS5 |     |            | RPRLCTREEF  | TKKVRTNAAM  | GAVFTEENQW  | DSARAAVEDE | EFWKLVDREK  | ELHKQKCGS   | CVYNNMGKRE   | KKLGEFGKAK |
| DENV4 NS5 |     |            | NPRLCTREEF  | ISKVRSNAAI  | GAVFQEEQGW  | TSASEAVNDS | RFWELVDKER  | ALHQEGKCES  | CVYNNMGKRE   | KKLGEFGRAK |
| DENV1 NS5 |     |            | GSRAIYMWL   | GARFLEFEAL  | GFMNEDHWFS  | RENSLSGVEG | EGLHKLGYIL  | RDISKIPGGN  | MYADDTAGWD   | TRITEDDLQN |
| DENV2 NS5 |     |            | GSRAIYMWL   | GARFLEFEAL  | GFLNEDHWFS  | RENSLSGVEG | EGLHKLGYIL  | RDVSKKEGGA  | MYADDTAGWD   | TRITLEDLKN |
| DENV3 NS5 |     |            | GSRAIYMWL   | GARYLEFEAL  | GFLNEDHWFS  | RENSYSGVEG | EGLHKLGYIL  | RDISKIPGGA  | MYADDTAGWD   | TRITEDDLHN |
| DENV4 NS5 |     |            | GSRAIYMWL   | GARFLEFEAL  | GFLNEDHWFG  | RENSWSGVEG | EGLHRLGYIL  | EDIDKKGDL   | IYADDTAGWD   | TRITEDDLLN |
| DENV1 NS5 |     |            | EAKITDIMEP  | EHALLATSIF  | KLTYQNKVVR  | VQRPANNGTV | MDVISRRDQR  | GSGQVGTYGL  | NTFTNMEAQL   | IRQMESEGIF |
| DENV2 NS5 |     |            | EEMVTNHMEG  | EKKLAEAIIF  | KLTYQNKVVR  | VQRPTRPGTV | MDIISRDRQR  | GSGQVGTYGL  | NTFTNMEAQL   | IRQMEGEGVF |
| DENV3 NS5 |     |            | EAKITQQMDP  | EHRQLANAIF  | KLTYQNKVVR  | VQRPTRPGTV | MDIISRDRQR  | GSGQVGTYGL  | NTFTNMEAQL   | IRQMEGEGVL |
| DENV4 NS5 |     |            | EELITEQMAP  | HHKILAKAIF  | KLTYQNKVVR  | VLRPTPKGAV | MDIISRDRQR  | GSGQVGTYGL  | NTFTNMEVQL   | IRQMEAEGVI |
| DENV1 NS5 |     |            | SPSELETPNL  | AER-VLDWLK  | KHGTERRLRM  | AISGDDCVVK | PIDDRFATAL  | TALNDMGKVR  | KDIPQWEPK    | GWNDWQQVPP |
| DENV2 NS5 |     |            | KSIQHLTVT-  | EEIAVQNLWA  | RVGRERLSRM  | AISGDDCVVK | PLDDREFASAL | TALNDMGKVR  | KDIQQWEPKSR  | GWNDWTQVPP |
| DENV3 NS5 |     |            | SKTDLENPHL  | LEKKITQWLE  | TKGVERLRM   | AISGDDCVVK | PIDDRFANAL  | LALNDMGKVR  | KDIPQWQPSK   | GWHDWQQVPP |
| DENV4 NS5 |     |            | TRDDMHNPKG  | LKERVEKWLK  | ECGVDRLRM   | AISGDDCVVK | PLDERFSTSL  | LFLNDMGKVR  | KDIPQWEPK    | GWKNWQEVPP |
| DENV1 NS5 |     |            | CSHHFHQLIM  | KDGREIVVPC  | RNQDELVGRA  | RVSQAGWSL  | RETACLGKSY  | AQMWSLMYFH  | RRDLRLAANA   | ICSAVPVDWV |
| DENV2 NS5 |     |            | CSHHFHELIM  | KDGRVLVPC   | RNQDELIGRA  | RISQAGWSL  | RETACLGKSY  | AQMWSLMYFH  | RRDLRLAANA   | ICSAVPVSHV |
| DENV3 NS5 |     |            | CSHHFHELIM  | KDGRKLVVPC  | RPQDELIGRA  | RISQAGWSL  | KETACLGKAY  | AQMWSLMYFH  | RRDLRLASNA   | ICSAVPVHV  |
| DENV4 NS5 |     |            | CSHHFHKIFM  | KDGRSLVPC   | RNQDELIGRA  | RISQAGWSL  | RETACLGKAY  | AQMWSLMYFH  | RRDLRLASMA   | ICSAVPTEWF |
| DENV1 NS5 |     |            | PTSRTTWSIH  | AHQWMTTED   | MLSVNVRVWI  | EENPWEDKT  | HVSSWEDVPY  | LGKREDRWCG  | SLIGLTARAT   | WATNIQVAIN |
| DENV2 NS5 |     |            | PTSRTTWSIH  | AKHEWMTTED  | MLTVNVRVWI  | QENPWEDKT  | PVESWEEIPY  | LGKREDQWCG  | SLIGLTSRAT   | WAKNIQTAIN |
| DENV3 NS5 |     |            | PTSRTTWSIH  | AHQWMTTED   | MLTVNVRVWI  | EDNPWEDKT  | PVTTWEDVPY  | LGKREDQWCG  | SLIGLTSRAT   | WAQNILTAIQ |
| DENV4 NS5 |     |            | PTSRTTWSIH  | AHQWMTTED   | MLKVNRVWI   | EDNPNMIDKT | PVHSWEDIPY  | LGKREDLWCG  | SLIGLSSRAT   | WAKNIQTAIT |
| DENV1 NS5 |     |            | QVRRLIGNEN  | YLDFTSMKR   | FKNESDPEGA  | LW 899     |             |             |              |            |
| DENV2 NS5 |     |            | QVRSLIGNEE  | YTDYMPMKR   | FRKEEEEAGV  | LW 900     |             |             |              |            |
| DENV3 NS5 |     |            | QVRSLIGNEE  | FLDYMPMKR   | FRKEEESGGA  | IW 900     |             |             |              |            |
| DENV4 NS5 |     |            | QVRNLIGKEE  | YVDYMPMKR   | YSAHFEESEGV | L- 900     |             |             |              |            |

S7 Fig. Protein sequence alignment of the full-length DENV1-4 NS5 proteins used in this study. The alignment was performed using the MultAlin program (<http://multalin.Toulouse.inra.fr/multalin/multalin.html>). The high-, low-, and neutral-consensus amino acid residues are depicted in red, blue, and black colors according to the MultAlin program, respectively. The DENV2 RdRp protein (a.a. 251-896) used for the crystallographic analyses and the fragment screening contains G321V and K891R substitutions (the same sequence as in PDB ID: 5K5M [11]).
