# Supplementary material for: Discovery of a small molecule inhibitor targeting dengue virus NS5 RNA-dependent RNA polymerase
Source: PubMed Central journal article supplement (PMC6886872; doi:10.1371/journal.pntd.0007894), 2019-11-18
Supplement: pntd.0007894.s008.pdf [file pntd.0007894.s008.pdf]

**S8 Fig.**

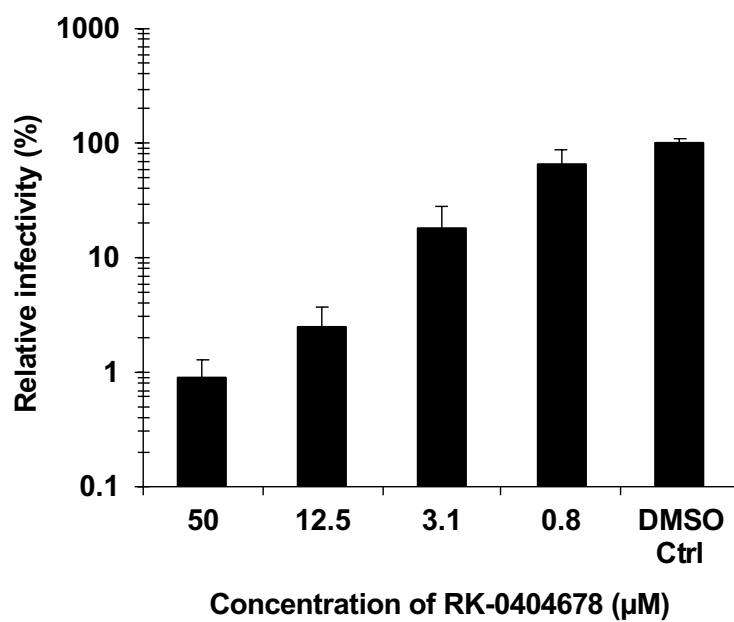

**S8 Fig. Sensitivity of the RK-0404678-adapted (P9) virus to RK-0404678.** The viral titer in the culture supernatant was evaluated by RT-qPCR. The results shown are the mean and standard deviation of triplicate measurements.
