# Supplementary material for: Discovery of a small molecule inhibitor targeting dengue virus NS5 RNA-dependent RNA polymerase
Source: PubMed Central journal article supplement (PMC6886872; doi:10.1371/journal.pntd.0007894), 2019-11-18
Supplement: pntd.0007894.s009.pdf [file pntd.0007894.s009.pdf]

# S9 Fig.

## DENV1

GGTACCGGTGCCCAAGGGGAAACCTTAGGTGAAAAATGGAACGCCAGCTGAATCAGCTTTCCAAAAGCGAGTTCAACACGTATAAACGGTC  
CGGAATTATCGAGGTCGATCGCTCTGAAGCAAAAGAAGGCTTGAACCGTGGTGAGCCGACCAAAATCGCGTAAAGTCGCGGCACAGCGAAAT  
TACGCTGGTTCGTGGAACGCAATCTGGTTAAACCAGAGGGTAAAGTTATCGATCTGGGTTCGCGCCGTGGTGGGTGGTCTTACTATTGTGCC  
GGTCTGAAAAAAGTACCAGGAAAGTAAAGGCTACACGAAAGCGGTCCTGGTCACGAAAGAACCGATTCCGATGGCCACGCTACGGCTGGAACCT  
GGTCAAACGTATTTCGGGCAAAGATGTCTTCTTTACGCCCGCCGAAAAATGCGATACGCTGCTGTGTGACATTGGAGAGTCTAGCCCAAAC  
CGACCATTGAAGAAGGTCGTACGTTGCGCGTCTGAAAGATGGTGAACCTTGGCTTCGTGGCAATCAGTTTTGCATCAAGATTTTAAACCC  
TACATGCCAAGCGTCGTGAAACTCTTGTAGCAAATGCAGCGCAAACATGGTGGCATGCTCGTTCCGATCCGCTGTCTCGCAACTCAACCCA  
CGAAATGTACTGGGTAGCTGTGGTACCAGAAACATCGTATCGCGGTGAATATGACTTCCCGTATGTTGCTGAATCGCTTTACGATGGCTC  
ATCGTAAGCCGACGTATGAACCGGATGTGATCTCGGCGCAGGGACCAGGCATGTGGCAGTGAACCGGAAGTGGCAATTTAGACATTATT  
GGCCAGCGCATAGAAAACATCAAAAATGGCCATAAGAGTACATGGCATATGATGAGGATAACCCCTATAAGACGTGGGCTTATCACGGTTC  
GTATGAAGTGAACCGAGTGGTTCAGCCTCGTCAATGGTAAATGGGGTGGTTCGCTTGTAAACCAAGCCTTGGGACGTGATCCCTATGGTTA  
CCGAGATTGCTATGACTGATACGACCCCTTTGGACAACAGCGGTTTTCAAGGAGAAAGTCGATACACGGACCCAAAAGCAAACCGGGC  
ACCGCCAAATATGGAAGTTACCGCTCGTTGGCTTTGGGGCTTCTCTCGCGCAACAAAAACCGGCTATATGCACACGTGAAGAATTTAC  
GAGAAAAGTGCAGTCGAACCGCCCAATCGGTGCCGTGTTCTGTGGACGAGAACCAGTGAACAGCGGAAAAGAGCTGTGGAAGACGAGCGCT  
TTTGGGATTTGGTTCATCGTGAACGGGAACGACAAACAGGGCAAATGTGCCACTTGTGTGTACAACATGATGGGGAACCGGAAAAA  
CTGGGCGAGTTTGGCAAAGCCAAAGGTAGCAGAGCGATTTGGTACATGTGGCTGGGCGCGGATTTCTGGAGTTCGAAGCTCTGGGTTTAT  
GAATGAGGATCAGTGGTTTAGCCGTGAAAACCTACTAAGCGGTGTTGAAGGGGAAGGCTTACATAAACTGGGCTATATCCCTGCGTGCATTT  
CCAAGATTCGGGTGGCAACATGTACGCCGATGACACCGCAGGCTGGGATACCCGATTACCGAGGACGACTTGCAGAATGAGGCTAAGATC  
ACGGACATAATGGAACCGGAACATGCATTGCTTGGCACTAGTATTTTCAAACCTACGTACCAGAATAAAGTAGTCCGGGTTACGCGACCGGC  
GAAAAACGGGACTGTAATGGATGTCTTAGTCTGTGACCAACCGTGGATCTGGACAAGTAGGGACCTATGGGCTGAATACCTTACCAATA  
TGAAGCGCAGCTGATTAGACAAATGGAATCGGAAGGCATCTTTTCGCCAAGCGAACTGGAGACCCAAAACCTGGCTGAACCGCTCTTAGAC  
TGGTGAATAAACATGGCACCAGCTCTTAAGCGTATGGCAATCTCCGGTGTGATGATTGCGTGGTCAAGCCGATCGACGATCGTTTGGGAC  
AGCGCTGACTGCGCTGAACGATATGGGGAAGTTTCGAAAGATATCCCGCAATGGGAACCAAGCAAAGGATGGAACGATTTGGCAGCAGGTTT  
CGTTTTGCAGTACCATTTCACCAGCTGATCATGAAAGATGGCCGTGAAATCGTGGTTCGCTGCCGGAATCAAGACGAGTTAGTAGCCGC  
GCCGAGTTTCTCAAGGCGCTGGTTGGTCACTGCGTGAACGGCATGTCTGGGTAAATCCTATGCGCAAAATGTGGCAGCTCATGTACTTTCA  
TCGTGCGATTTACGCTGCGCAGCAACGCCATTTGCAGTGGGTGCCCGTGGATTTGGGTTCTTACGTCACGCACAACCTGGAGCATTCACG  
CGCATCATCAGTGGATGACCACGGAAGACATGCTGAGCGTGTGGAACCGCGTGTGGATCGAAGAAAATCCGTTGGATGGAGGATAAACACAC  
GTGAGCTCTTGGGAAGATGTACTTTATCTTGGCAAACGAGAAGATCGTTGGTGTGGTTCCTGATTGGCCTCACTGCACGTGCGACCTGGGC  
GACTAATATCCAGGTGGCGATTAATCAGGTGCGCCGCTGATTGGAATGAGAACATATCTCGACTTATGACTAGCATGAAACGCTTCAAGA  
ACGAGAGTGATCCCGAAGCGCGCTGTGG

## DENV2

GGCACCGGCAACATTGGCGAAACCTGGGCGAAAAATGAAAAAGCCGCTGAAACGCGCTGGGCAAAAGCGAATTTAGATTATAAGAAAAA  
CGGCATTTCAGGAAGTGGATCGTACCCTGGCGAAAGAAGGCATTAACCGTGGCGAAACCGATCATCATGCCGTGAGCCGTGGCAGCGCGAAAC  
TGCGTTGGTTTGTGGAACGTAACATGGTGAACCCCGAAGGCAAAGTGGTGGATCTGGGCTGCGGCGTGGCGGCTATTATTATTCGGGC  
GGCTGAAAAACGTCGTTGAAGTGAAGGCTGACCAAGGCGCCCGGCCATGAAGAACCGATTCCGATGACCACTATGGCTGGAACCT  
GGTGGCTGCAAAGCGCGTGGATGTGTTTTTACCCTGCGGAAAAATGCGATACCCGCTGTGTGCGATATTGGCGAAAGCAGCCGAAAC  
CGACCGTGAAGCGGCGCTACCCTGCGTGTGCTGAACCTGGTGGAAAACTGGCTGAACAACAACACCCAGTTTTGCATTAAGTGTGTAAC  
CGTATATGCCGAGCTGATTGAGAAAAATGGAAGCGCTGCAACGTAATATGGCGCGCGTGGTGCATAACCGCTGAGCCGTAACAGCAC  
CCATGAAATGTATTGGCTGAGCAACCGCAGCGGCAACATTGTGAGCAGCGTGAACATGATTAGCCGTATGCTGATTAACCGTTTTACCATGC  
GTCATAAGAAAGCGACCTATGAACCGGATGTGGATCTGGGCGAGCGCACCCGTAACATTGGCATTGAAGCGAAATTCGGAACCTGGATATT  
ATTGGCAAACGTTATTGAGAAAAATTAACAGGAACATGAAACCGAGTGGCATTATGATCAGGATCATCCGATATAAAACCTGGGCGTATCATGG  
CAGCTATGAAACCAAACAGACCGGCGAGCGAGCAGCATGGCAACGGCGTGGTGGCTGCTGACCAAAACCGTGGGATGTGGTGGCGATGG  
TGACCCAGATGGCGATGACCGATACCACCCGTTTTGGCCAGCAGCGTGTGTTTTAAGAAAAAGTGGATACCCGTACCCAGGAACCGAAAGAA  
GGCACCAGAAACTGATGAAAAATACCCTGGAATGGCTGTGGAAGAACTGGGCAAAAGAAAACCCCGCTATGTGCACCCGTGAAGAATT  
TACCCTGAAAGTGCCTAGCAACCGCGCGCTGGGCGGATTTTTACCGATGAAAACAAATGGAAAAGCGCGCTGAAGCGGTGGAAGATAGCC  
GTTTTTGGGAACTGGTGGATAAAGAACGTAACCTGCATCTGGAAGGCAAAATGCGAAACCTCGCTGTATAACATGATGGCAACCGTGAAGAA  
AACTGGGCGAATTTGGCAAAGCGAAAGGCGAGCCGTCGATTTGGTATATGTGGCTGGGCGCGCTTTCTGGAAATTTGAAGCGCTGGGCTT  
TCTGAACGAAGATCATTTGGTTTAGCCGTGAAAAACAGCCTGAGCGGCGTGGAAAGCGAAAGGCTGCATAAAACCTGGGCTATATTCTGCGT  
TGAGCAAGAAAGAAAGCGCGCGATGTATGCGGATGATACCCTGGGATACCCGATTTACCTGGAAGACCTGAAAAACGAAGAAATG  
GTGACCAACCATGGAAGGCGAACATAAGAACTGGCGGAAGCGATTTTTAAACTGACCTATCAGAATAAAGTGGTGGCTGTGACGCTCC  
GACCCCGCTGGCACCGTGTGATGATATTATTAGCCGCTGTGATCAGCGTGGCAGCGGCCAAGTGGGCACTTATGGCTGAACACCTTTACCA  
ACATGGAAGCGCAGCTGATTCGTCAGATGGAAGGCGAAGGCGTGTAAAAAGCATTTCAGCATCTGACCGTGAACGAAAGAAATGGCGTGCAG  
AAGTGGCTGGCGCTGTGGGCGTGAACGCTCTGAGCCGATGCGGATTTAGCGCGATGATGCGTGGTGAACCGCTGGATGATCGTTTTGCG  
GAGCGCGCTGACCGCGCTGAACGATATGGGCAAAGTGCCTGAAAGATATTTCAGCAGTGGGAACCGCTCTCGTGGCTGGAACGATTTGACCCAGG  
TGCCGTTTTGCAGCCATCATTTTTCATGAACTGATTATGAAAGATGGCCGTGTTCTGGTGGTGGCGTGGCGTAACCGGATGAACTGATTGGT  
CGTGCAGTATTAGCCAGGCGCGGTTGGAGCCTGCGTGAACCGCATGCCTGGGTAAGCTATGCGCAGATGTGGAGCTGATGTATTT  
TCATCGTCTGATCTGCGTCTGGCAGCAACCGGATTTGCAGCGCGTGGCAGCCATTGGGTGCCGACCGCTACCCTGGAGCATTC  
ATGCGAAACATGAATGGATGACCACCGAAGATATGCTGACCGTGTGGAACCGTGTGGATTCAGGAAAACCCGTTGGATGGAAGATAAAAC  
CCGGTGAAGCTGGGAAGAAATCCGATCTGGGCAAACGTGAAGATCAGTGGTGGCGCAGCCTGATTGGCTGACCGCGCTGCGACCTG  
GGCAGAAACACTTGCAGCCGATTAACCAAGTGGTGGCTGATTGGCAATGAAGAATATACCGATTATATGCCGAGCATGAAACGTTTTTC  
GTAAGAAAGAAAGAAAGCGGCGTGTGG

## S9 Fig. (continued)

### DENV3

GCACAGGCAGTCAAGGCCAAACTCTGGGTGAAAAGTGAAGAAACGTTTAAACCAGCTTTACGCAAGGAGTTCGACTTATACAAGAAAAG  
CGGAATTACCGAAGTGGACCGCACCGAGGCCAAAGAAGGTCTGAAACGTGGGGAGATTACCCATCATGCTGTTTTCCCGTGGCTCGGCAAAAC  
TGCAGTGGTTCGTAGAACGCAATATGGTGTATCCCTGAAGGCCGCGTTATCGACCTGGGCTGTGGTTCGGGGCGGTTGGAGTTATTATTGCGCC  
GGGCTTAAGAAAAGTTACTGAAGTACGTGGTTACTATAAGGAGGACCGGGCCACGAAGAACCAGTACCGATGAGTACCTACGGCTGGAATAT  
CGTCAAGCTGATGTCGGGGAAAGACGTGTTTTATCTGCCACCGGAGAAAATGCGACACCCCTTCTGTGCGATATGGTGAATCCTCGCCAAGTC  
TACCCGTGGAAGAGTCCCCTACGATTCGCGTTCTGAAAATGGTCAACCCGTGTAACCCGTGATCTGTATCAAAGTGCCTCAATCCG  
TATATGCGCACCGTAATCGAACACTTAGAGCGCTTACAGCGCAAGCACCGGTGGCATGCTGGTTCGTAACCCGCTGAGCCGTAACCTACTCA  
CGAAATGTACTGGATCAGCAATGGTACGGGAAACATCGTATCAAGCGTCAATATGGTGTACGCGCTGTTGCTGAACCGTTTTACCATGACGT  
ACCGTCGCCGACTATCGAGAAAAGACGTGATTTGGGCGCAGGCACCCGCCACGTGAACGCTGAACCAGAAAACGCAACATGGATGTTATC  
GGGAACGCATTCCGCGCATCAAAGAAGAGCACTCCTCTACCTGGCATTACGACGATGAGAACCCTATAAAAACGTGGGCATATCATGGCTC  
GTATGAAGTGAAGGCGACAGGATCCGCCTCTAGCATGATTAATGGAGTGGTGAACCTGTTAACCAAACCGTGGGATGTCGTACCGACCGTTA  
CACAGATGGCGATGACCGACACTACGCCCTTTGGACAACAGCGTGTGTTAAAGAAAAGGTGACACTCGTACGCCCAAACCCATGCCTGGC  
ACGCGCAAAGTGTAGGAGATTACGCGCGGGTTGGCTCTGGCGTACGCTGGGTTCGTAACAAACGTCGCGCCCTGTGTACTCGCGAAGAATTTAC  
TAAAAAAGTGGCACCATGCGGCTATGGGCGCGGTGTTTACGGAGGAAAACAGTGGGACAGCGCACGCGCTGCAGTAGAGGACGAAGAAT  
TCTGAAACTGGTGGACCGGAGCGTGAATTACACAAGCAAGGTAATGCGGAAGTTGCGTCTATAATATGATGGGCAAGCGGAAAAA  
CTGGGTGAATTCGGTAAAGCTAAAGGCTCTCGGGCAATTTGGTACATGTGGCTGGGTGCGGTTATCTGGAATTTGAGGCCCTCGGTTTTCT  
GAACGAAGATCATTGGTTTTCCCGCGAGAACAGCTATAGTGGTGTGAAGGGGAAGGCCTGCATAAATGGGCTACATTTCTCGGGATATCA  
GCAAAATTCGGGCGGGGCCATGTATGCCGATGATACAGCAGGGTGGGATACCCGCATTACCGAAGATGACTTGCACAATGAAGAGAAAAT  
ACGCAGCAAATGGATCCCGAACATCGCCAGCTTGGGAACGCCATTTTCAAACCTGACCTATCAGAACAAGTTGTCAAGGTTACGCGTCTAC  
CCCAAAGGGGACCGTTATGGATATTATCTCACGAAAAGATCAGCGGGCTCTGGTACAGTTGGTACCTACGGCCTAACACATTCACGAACA  
TGGAAAGCCAGTTAATTCGTGATGGAGGGTGAAGGTGTCTGTGCAAAAACCGACCTGGAGAACCAGCATCTCTGGAAAAAATCACC  
CAGTGGCTTGAACGAAAGGGTGGAGCGCTGAAACGATGGCGATTTCCGGCGATGATTGTGTGGTCAAACCGATTGATGATCGGTTTGC  
CAATGCATTTGTTAGCACTGAACGATATGGGCAAAGTCCGCAAAGACATTCGCGAATGGCAACCGAGTAAAGGTTGGCATGATTGGCAGCAAG  
TTCCGTTCTGCTCGCATCACTTTCACGAACTCATTATGAAAGACGGACGCAAAATGGTGTGCCGTGTCGTCCACAGGATGAACCTTATTGGC  
CGTGTCTGATTTCAACAGCCGCGGTTGGTCACTGAAGGAAACAGCGTGTCTCGGCAAAGCCTATGCGCAAATGTGGGCGCTGATGACTT  
TACCCGCGTATGATCCAGCTGGCGTCTAATGCAATCTGCGACGCGCTACCGTTTATTGGGTGCCAACGCTACCACCTGGAGCATTTC  
ATGCCATCATCAGTGGATGACTACGGAAGATATGCTGACCGTGTGGAATCGCGTGTGGATCGAAGATAATCCTTGGATGGAAGATAAAACG  
CCCGTAACCACCTGGGAAGATGTTCTTATCTGGGCAAACCGGAGGATCAATGGTGGCGGTTTAAATCGGCTGACCTCCCGCGCTACATG  
GGCGCAGATATCCTGACAGCGATTACGCAAGTCCGTAGCCTGATCGGTAATGAGGAATTCCTGGATTACATGCGGAGCATGAAACGCTTTC  
GCAAAGAAGAAGAGAGCGAAGCGCGATTGG

### DENV4

TCCTTGATTAATAATGCCAAACACCGCGCGTGGTACGGGCACGACCGCGCAAACGCTTGGCGAAAAGTGAACAGCCAGTTGAACAGCCT  
TGATCGCAAAGAGTTCGAGGAATATAAGCGATCAGGTATACTGGAAGTCGATCGAAGTGAACGAAAAGTGCCTCAAAGATGGCAGTAAAA  
TCAAATATCGGGTATCCCGTGTACAAGCAAAATTCGGTGGATTGTTGAACGCGGTATGGTTAAACC GAAAGGCAAAGTTTGGATTGGGG  
TGTGGACGCGGTGGTTGGAGCTACTACATGGCGACTCTGAAGAATGTCACTGAGGTGAAGGGCTATACGAAAGCGGTCCGGGCCATGAGGA  
ACCCATCCCGATGGCCACCTATGGCTGGAATCTGGTGAACCTGCATTCGGGTGTTGACGTGTTCTATAAACCGACCGAACAGGTTGACACGC  
GTTGTGGGACATGGTGTAGAGCTCTTCAATCCCAATCGAAGTGGTGCACGCTGCGCGTGTAAAATGGTTGAACTTGGCTTCTTCT  
AGCAAACCGGAGTTTTGCATCAAAAGTCTTGAATCCGTATATGCTACCGTGAATGAGGAATTGGAAAAACTGAAAAGAAAACATGGCGGTAG  
TCTAGTTCGCTGTCTCTGTCTCGCAATTAACCCACGAAATGTACTGGGTTAGCGGGTTTCTGGTAAACATTGTGTCTCGCTCAACACTA  
CCTCGAAGATGCTGTGAATCGTTTACGACTCGTACCGTAAACCAACCTACGAAAAGGATGCGAGATTTAGGCGCTGGCACACGCTCCGTC  
TCCACCGAAACCGAAAAGCCGGACATGACGATAATTTGGGAGACGCTTACAACGCTTACAAGAGGAGCAACAAGGAAACCTGGCATTATGACCA  
CGAAAACCCGATCGGACTTGGGCATATCATGGGTCTATGAAGCGCCATCAACCGGAAGTGCACGACGATGGTGAACGGTGTGTGAAAC  
TCTTAACCAAACCGTGGGATGTGGTACCGATGGTGAATCACTGGCTATGACCGATACCCACCGCTTGGTGCAGCAGCGCGTGTTCGAAAG  
AAAGTCGATACGCGAACCCTCAGCCCCAAACCGGGGACTCGTGTGGTGTGACTACCCACCGCAACTGGCTGTGGGCACTGTGGGCGCTAA  
GAAAAACCCAGTTTTGTGTACGCGCAAGAATTTATCTCAAAAGTCCGCTCTAATGCAGCCATCGGTGCAGTGTTCAGGAAGAACAAGGTT  
GGACATCTCGCTCAGAGCCGTAATGATAGCCGTTTTGGGAACTGGTGCATAAAGAACGCGCCCTCCATCAGGAAGGCAAATGCGAGTCG  
TCCGTGTATAACATGATGGGGAAACGCGAGAAGAAACTGGGAGAGTTTTGGTTCGTGCGAAAAGGCTCTCGTGCCATCTGGTACATGTGGCTCGG  
CGCACGCTTCTTGAATTTGAAGCGTTAGGATTTTTAAACGAAAGATCACTGGTTTTGGCCGTGAGAACCTGTGGTCTGGCGTAGAGGGAGAAG  
GCCTGCATCGTCTGGGTTACATTCGGAAGATATCGACAAAAAGACGGGGACTTGATCTACGCTGATGATACCGCTGGTTGGGACACTCGT  
ATCACCAGAGATGACCTGCTGAACGAAGAGCTGATCACGGAACAGATGGCGCCGATCACAAAATTCGGCTAAAGCGATCTTTAAGTTAAC  
CTATCAGAACAAGTGGTTAAAGTACTCCGTCCAACGCGGAAAGGAGCCGTGATGGACATTATTAGTCGGAAGATCAACGTGGTTCTGGTC  
AGGTGGGTACCTATGGCCTGAATACGTTACGAAATATGGAAGTTCAGCTGATTCGTGATGGAAGCGGAAGGAGTCACTACTCGTGTATGAC  
ATGCATAACCCAAAAGGCTGAAAGAGCGAGTGGAGAAATGGCTGAAAGAGTGTGGAGTAGACCGCTTGAAGCGCATGGCGATCAGCGGGGA  
TGATTGCGTAGTGAAGCCTCTGGACGAACGCTTTAGCACGTCGCTTCTGTTTTGAAACGATATGGGCAAAGTGGCTAAAGATATTCCCAGT  
GGGAACCTAGCAAGGGGTGAAAAATTTGGCAAGAGTACCGTTCTGCAGCCACCATTTCCACAAGATTTTCATGAAGGATGGCCGTTCTGCTG  
GTGGTCCCGTCCGCAATCAGGACGAACCTATTGGCCGCGCTCGGATTTACAGGGTGGCGGCTGGAGCCTCCGCGAAACCGCGTGTCTGGG  
CAAAGCGTACGCCCCAATGTGGTCCCTGATGTACTTTTATCGTGGGATTTACGCTTGGCTCAATGGCAATATGCTCCGCGGTTCCAACCG  
AATGGTTTTCAACATCGAAGAACCTGGAGTATTCATGCCATCACAGTGGATGACCACGGAAGATATGCTGAAAGTCTGGAACAGGGTT  
TGGATCGAAGACAACCCCAATATGATCGATAAAACCCCGTCCATAGCTGGGAAGACATTCGATCTCGGCAAACGTTGAGGATCTTTGGT  
TGTTTCTTGAATGGCCTGAGTAGTCGGGCGACATGGGCTAAAAACATTCAGACCGCAATCACCCAGGTGCGTAACTTAATCGGCAAAGAAG  
AATACGTTGATTATATGCGGTAATGAAACGTTACAGTGCACACTTTGAAAGCGAAGGGGTTTTA

**S9 Fig. Synthesized DNA sequences of the full-length DENV1-4 NS5 proteins used in this study.**
