# Supplementary material for: Discovery of a small molecule inhibitor targeting dengue virus NS5 RNA-dependent RNA polymerase
Source: PubMed Central journal article supplement (PMC6886872; doi:10.1371/journal.pntd.0007894), 2019-11-18
Supplement: pntd.0007894.s011.pdf [file pntd.0007894.s011.pdf]

## S1 Table

**S1 Table. Data collection and refinement statistics**

|                                        | DENV2<br>RK-0404678          | DENV2<br>Apo                 | DENV3<br>RK-0404678          | DENV3<br>Apo                 |
|----------------------------------------|------------------------------|------------------------------|------------------------------|------------------------------|
| <b>Data collection</b>                 |                              |                              |                              |                              |
| Space group                            | <i>I</i> 432                 | <i>I</i> 432                 | <i>C</i> 222 <sub>1</sub>    | <i>C</i> 222 <sub>1</sub>    |
| Unit-cell (Å)                          | 236.5, 236.5,<br>236.5       | 237.4, 237.4,<br>237.4       | 164.0, 179.3,<br>58.3        | 161.5, 177.4,<br>58.0        |
| Resolution (Å)                         | 77.2–2.43<br>(2.49–2.43)     | 53.1–2.11<br>(2.16–2.11)     | 64.7–1.97<br>(2.02–1.97)     | 62.7–2.14<br>(2.20–2.14)     |
| $R_{sym}$ (%)                          | 20.5 (228.5)                 | 5.8 (148.7)                  | 8.9 (226.4)                  | 13.3 (154.1)                 |
| $I/\sigma(I)$                          | 16.4 (1.8)                   | 28.2 (1.2)                   | 13.8 (0.8)                   | 12.1 (1.5)                   |
| Completeness (%)                       | 100 (100)                    | 95.7 (70.1)                  | 99.4 (99.9)                  | 99.9 (99.9)                  |
| Redundancy                             | 22.3 (22.6)                  | 13.7 (5.0)                   | 7.3 (7.5)                    | 7.4 (7.5)                    |
| CC <sub>1/2</sub>                      | 0.998 (0.601)                | 0.999 (0.398)                | 0.998 (0.609)                | 0.998 (0.616)                |
| <b>Refinement</b>                      |                              |                              |                              |                              |
| Resolution (Å)                         | 55.7–2.43<br>(2.49–2.43)     | 42.0–2.11<br>(2.16–2.11)     | 56.2–1.97<br>(2.00–1.97)     | 51.5–2.14<br>(2.19–2.14)     |
| No. reflections                        | 42496 (2666)                 | 62325 (3117)                 | 60752 (2604)                 | 46375 (3101)                 |
| $R_{work} / R_{free}$ (%)              | 19.7 / 23.1<br>(28.9 / 30.8) | 19.5 / 22.1<br>(30.7 / 35.3) | 22.3 / 25.5<br>(37.5 / 37.9) | 21.9 / 25.0<br>(32.1 / 36.0) |
| No. atoms<br>Protein / Water           | 4769 / 207                   | 4781 / 222                   | 4638 / 331                   | 4687 / 227                   |
| RMS<br>Bonds (Å) / Angles(°)           | 0.008 / 0.899                | 0.005 / 0.746                | 0.005 / 0.725                | 0.003 / 0.518                |
| Ramachandran<br>Favored / Outliers (%) | 97.0 / 0.35                  | 96.5 / 0.35                  | 96.3 / 0.18                  | 95.6 / 0.0                   |
