# Supplementary material for: Discovery of a small molecule inhibitor targeting dengue virus NS5 RNA-dependent RNA polymerase
Source: PubMed Central journal article supplement (PMC6886872; doi:10.1371/journal.pntd.0007894), 2019-11-18
Supplement: pntd.0007894.s012.pdf [file pntd.0007894.s012.pdf]

## S2 Table

**S2 Table. List of primers used in this study**

| <b>For the recombinant proteins</b> |                                                                                                                      |
|-------------------------------------|----------------------------------------------------------------------------------------------------------------------|
|                                     | Sequence (5' → 3')                                                                                                   |
| DENV1_NS5                           | F: CTCACAGAGAACAGATTGGTGGAGGTACCGGTGCCCAAGGGGAA<br>R: GGGCGGGGATCAATCAATCATTACCACAGCGCGCCTTCGGGATC                   |
| DENV3_NS5                           | F: CTCACAGAGAACAGATTGGTGGAGGCACAGGCAGTCAAGG<br>R: GGGCGGGGATCAATCAATCATTACCAAATCGCGCCTTCGCT                          |
| DENV4_NS5                           | F: CTCACAGAGAACAGATTGGTGGATCCTTGATTA AAAATGCCCAAAC<br>R: GGGCGGGGATCAATCAATCATTATAAAACCCCTTCGCTTTCA                  |
| DENV2_RdRp                          | F: CCAGCGGCTCCTCGGGA ACTTACGAGCCAGATGT<br>R: CCAGCGGCTCCTCGGGA ACTTACGAGCCAGATGT                                     |
| DENV3_RdRp                          | F: GAACAGATTGGTGGA ACTATCGAGAAAGACGTC<br>R: GATCAATCAATCATTATTCGCTCTCTTCTTCTTTGC                                     |
| DENV1_C708A                         | F: GTTCCGTTT <sub>gct</sub> AGTCACCATTTCACCAGCTGATCATG<br>R: AATGGTGACT <sub>tagc</sub> AAACGGAACCTGCTGCCAATCGTTCCAT |
| DENV1_C708Q                         | F: GTTCCGTTT <sub>cag</sub> AGTCACCATTTCACCAGCTGATCATG<br>R: AATGGTGACT <sub>ctg</sub> AAACGGAACCTGCTGCCAATCGTTCCAT  |
| DENV1_C779A                         | F: AACGCCATT <sub>gct</sub> AGTGCGGTGCCCGTGGATTGGGTTTCCT<br>R: GCACCGCACT <sub>tagc</sub> AATGGCGTTCGCTGCCAGACGTAAAT |
| DENV1_C779Q                         | F: AACGCCATT <sub>cag</sub> AGTGCGGTGCCCGTGGATTGGGTTTCCT<br>R: GCACCGCACT <sub>ctg</sub> AATGGCGTTCGCTGCCAGACGTAAAT  |
| DENV2_C709A                         | F: GTGCCGTTT <sub>gcg</sub> AGCCATCATTTTCATGAACTGATTATG<br>R: AATGATGGCT <sub>cgc</sub> AAACGGCACCTGGGTCCAATCGTTCC   |
| DENV2_C709Q                         | F: GTGCCGTTT <sub>cag</sub> AGCCATCATTTTCATGAACTGATTATG<br>R: AATGATGGCT <sub>ctg</sub> AAACGGCACCTGGGTCCAATCGTTCC   |
| DENV2_C780A                         | F: AACGCGATT <sub>gcg</sub> AGCGCGGTGCCGAGCCATTGGGTGCCGA<br>R: GCACCGCGCT <sub>cgc</sub> AATCGCGTTTGCTGCCAGACGCAGAT  |
| DENV2_C780Q                         | F: AACGCGATT <sub>cag</sub> AGCGCGGTGCCGAGCCATTGGGTGCCGA<br>R: GCACCGCGCT <sub>ctg</sub> AATCGCGTTTGCTGCCAGACGCAGAT  |

## S2 Table (continued)

| <b>For the recombinant viruses</b> |                                                                                    |
|------------------------------------|------------------------------------------------------------------------------------|
|                                    | Sequence (5' → 3')                                                                 |
| Fragment #1                        | 1F: AAGCAGAGCTGGTTTAGTGAACCGGAGTTGTTAGTCTACGTGGAC<br>1R: TTTCTGTCACAATTGGGTTGACTGT |
| Fragment #2                        | 2F: ACAGTCAACCCAATTGTGACAGAAA<br>2R: AGTCACTGCCAATTGATACTTTTCC                     |
| Fragment #3                        | 3F: GGAAAAGTATCAATTGGCAGTGACT<br>3R: TCTTCCTATTCTCCCTCTTCTTTGT                     |
| Fragment #4                        | 4F: ACAAAGAAGAGGGAGAATAGGAAGA<br>4R: ACTGAGGGCATATATGGGTTGAGAA                     |
| Fragment #5                        | 5F: TTCTCAACCCATATATGCCCTCAGT<br>5R: GCTTCCATATTGGTGAAAGTATTGA                     |
| Fragment #6                        | 6F: TCAATACTTTCACCAATATGGAAGC<br>6R: GAGGTGGAGATGCCATGCCGACCCTAGAACCTGTTGATTCAACAG |
| NS5 C709A                          | C704A-F: GTGCCCTTCgctTCACACCATTTCCATGA<br>C704A-R: ATGGTGTGAagcGAAGGGCACTTGTGTCC   |
| NS5 C709Q                          | C704Q-F: GTGCCCTTCcaaTCACACCATTTCCATGA<br>C704Q-R: ATGGTGTGAttgGAAGGGCACTTGTGTCC   |
| NS5 C780A                          | C775A-F: AATGCTATTgccTCGGCAGTACCATCACA<br>C775A-R: TACTGCCGAggcAATAGCATTGCGCCA     |
| NS5 C780Q                          | C775Q-F: AATGCTATTcaaTCGGCAGTACCATCACA<br>C775Q-R: TACTGCCGAttgAATAGCATTGCGCCA     |

The codons of each point mutation are represented by letters in lowercase.
